# Supplementary material
Source: publisher figshare collection journal article supplement (https://tandf.figshare.com/articles/dataset/_/5576443)

# c-Met (Tyr1234/1235)

LCMS Data

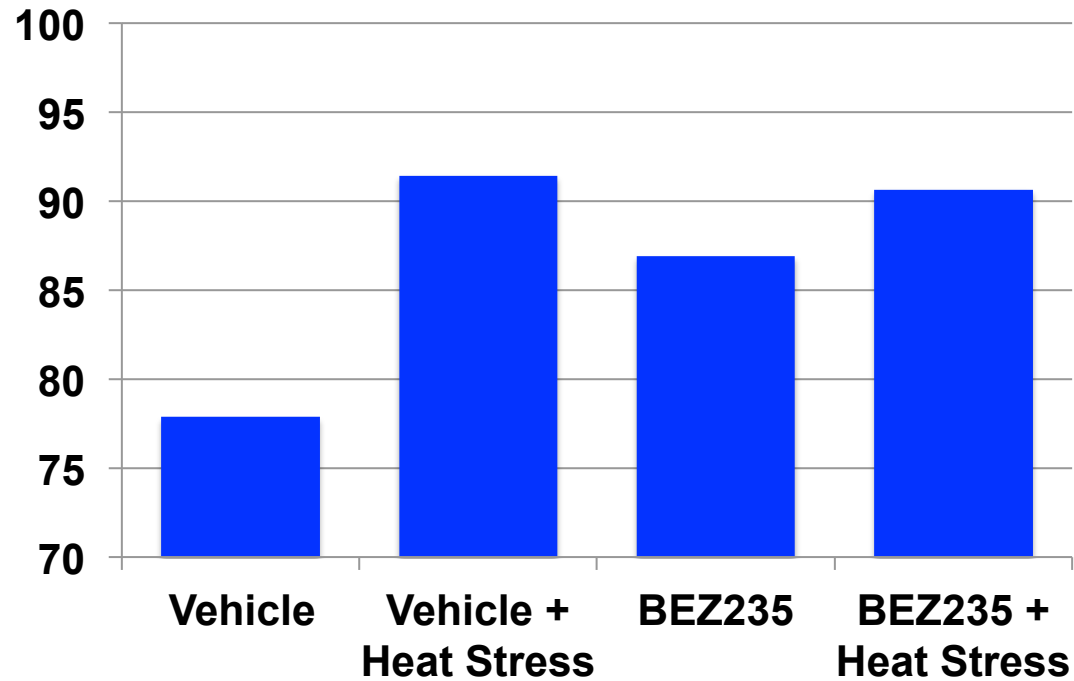

# Akt (Ser473)

LCMS Data

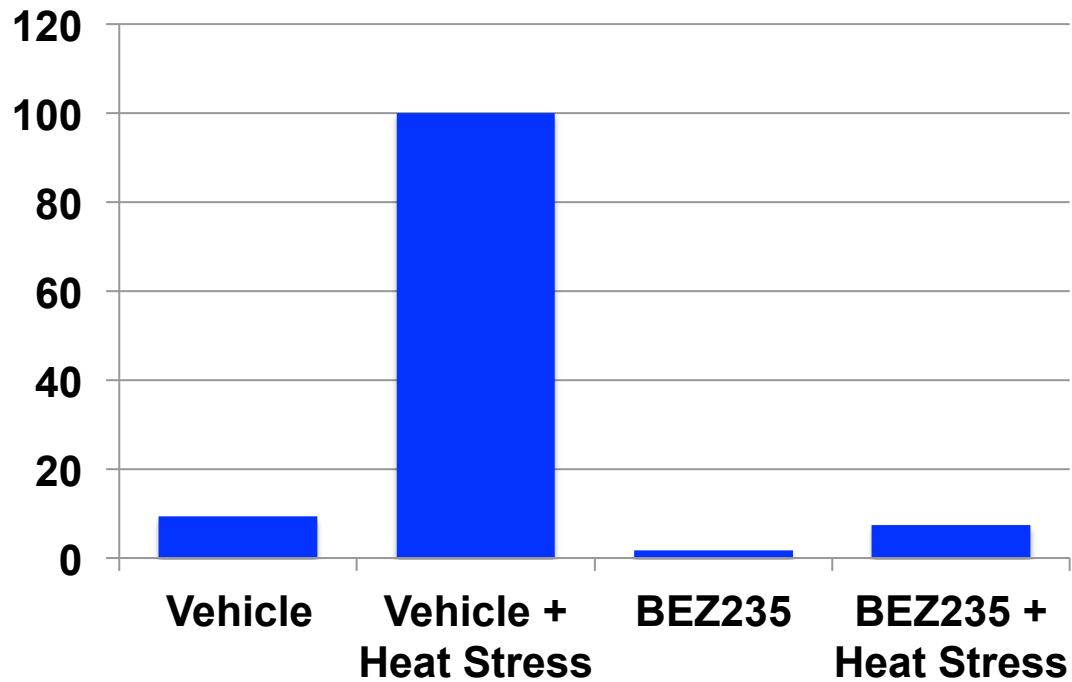

# PRAS40 (Thr246)

LCMS Data

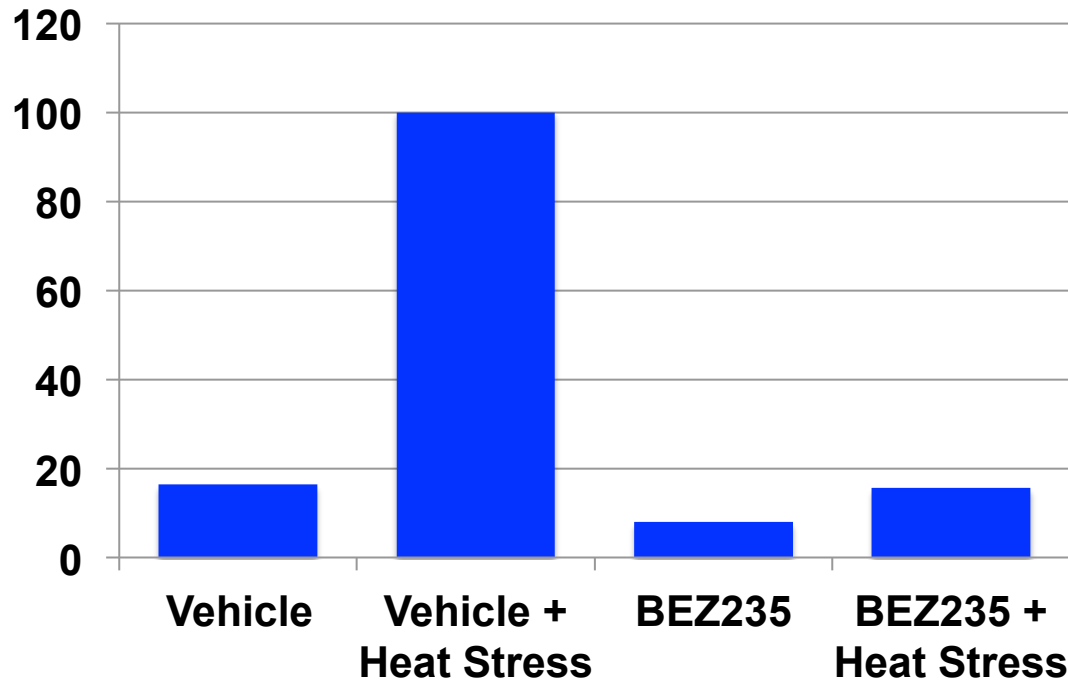

# 4E-BP1 (Thr37/46)

LCMS Data

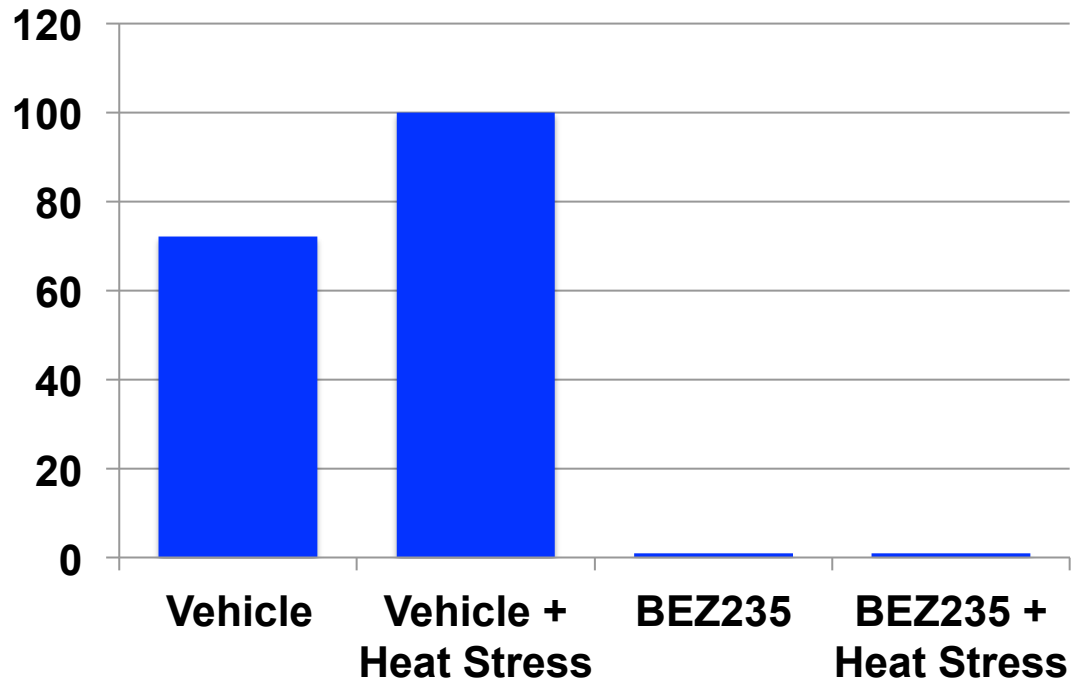

# Erk1/2 (Thr202/185, Tyr 204/187)

LCMS Data

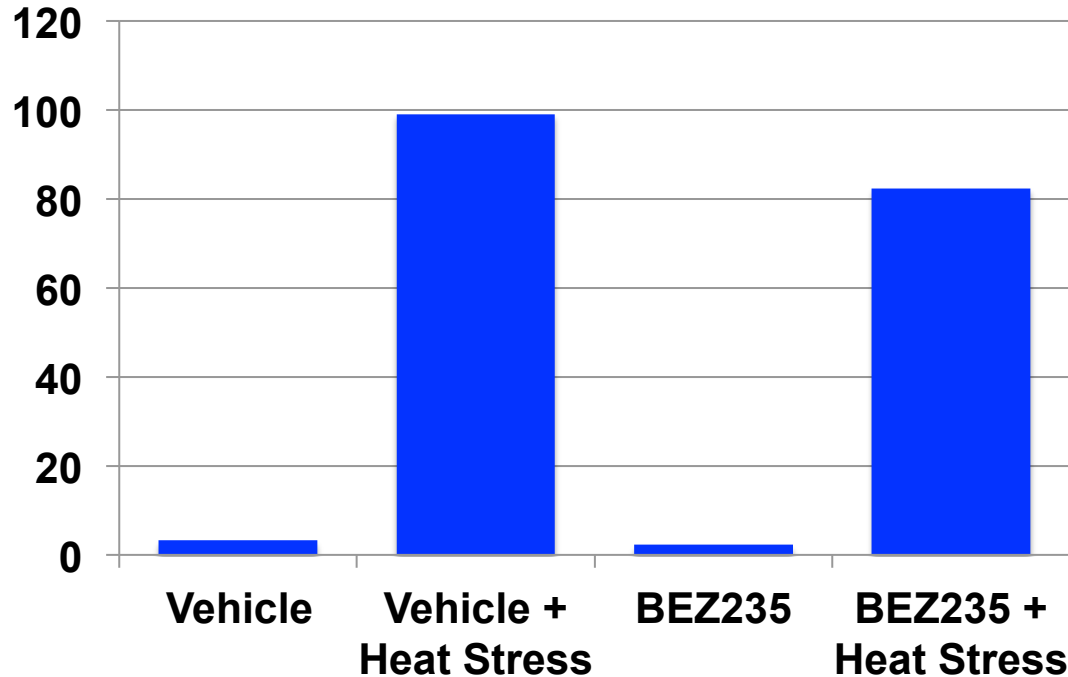

# SAPK/JNK (Thr183/Tyr185)

LCMS Data

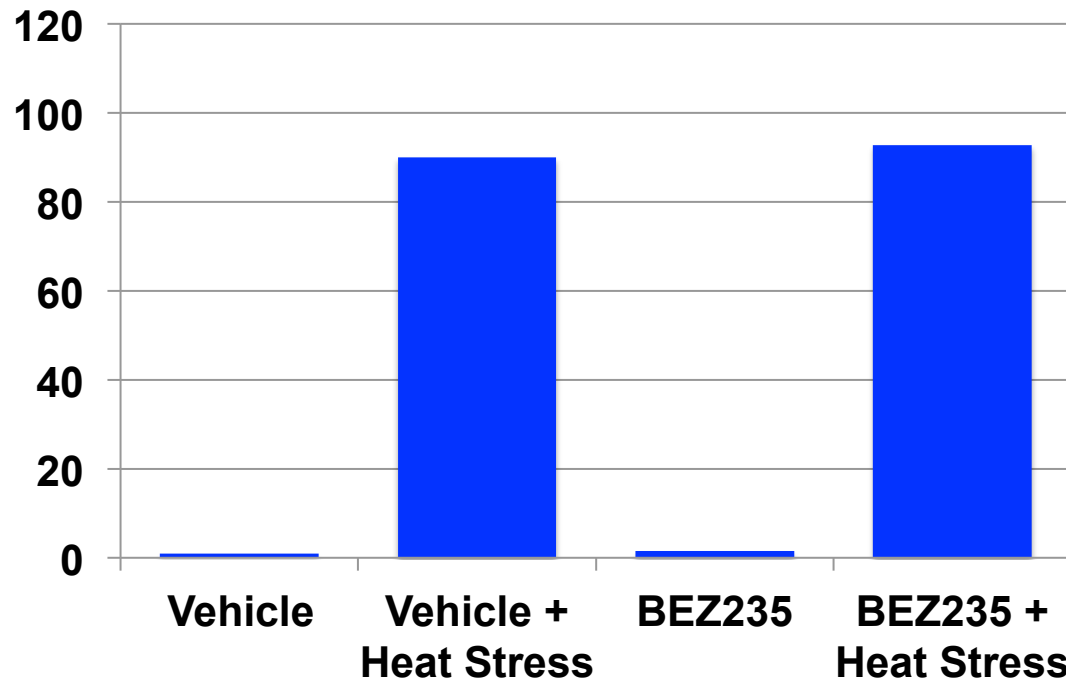

# c-Jun (Ser63)

LCMS Data

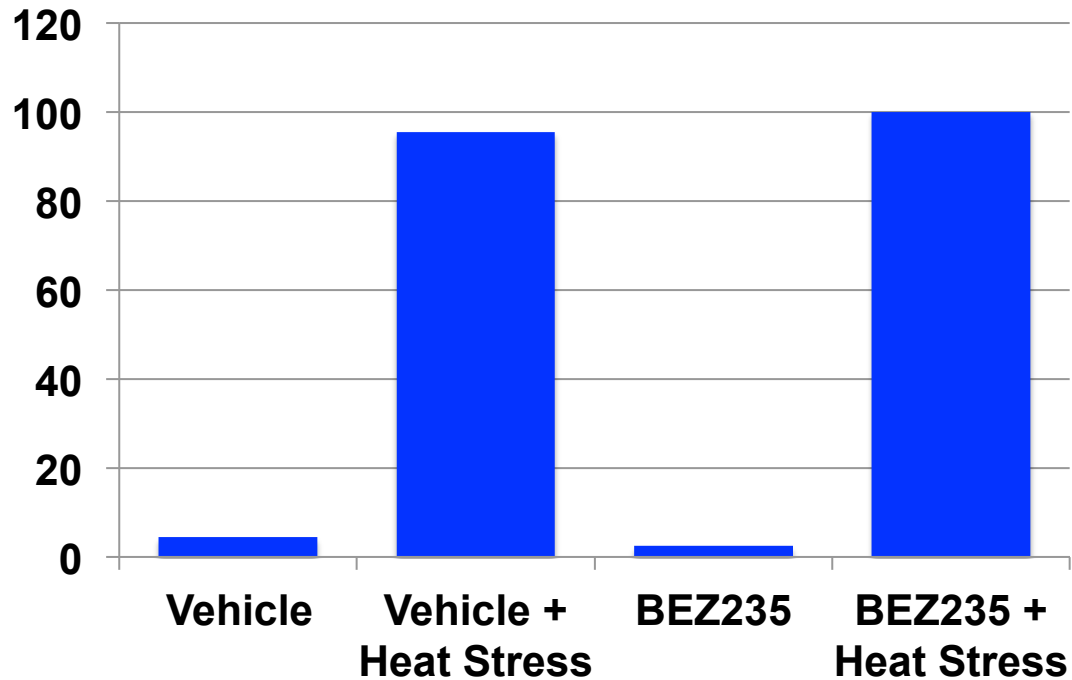

# c-Jun (Ser73)

LCMS Data

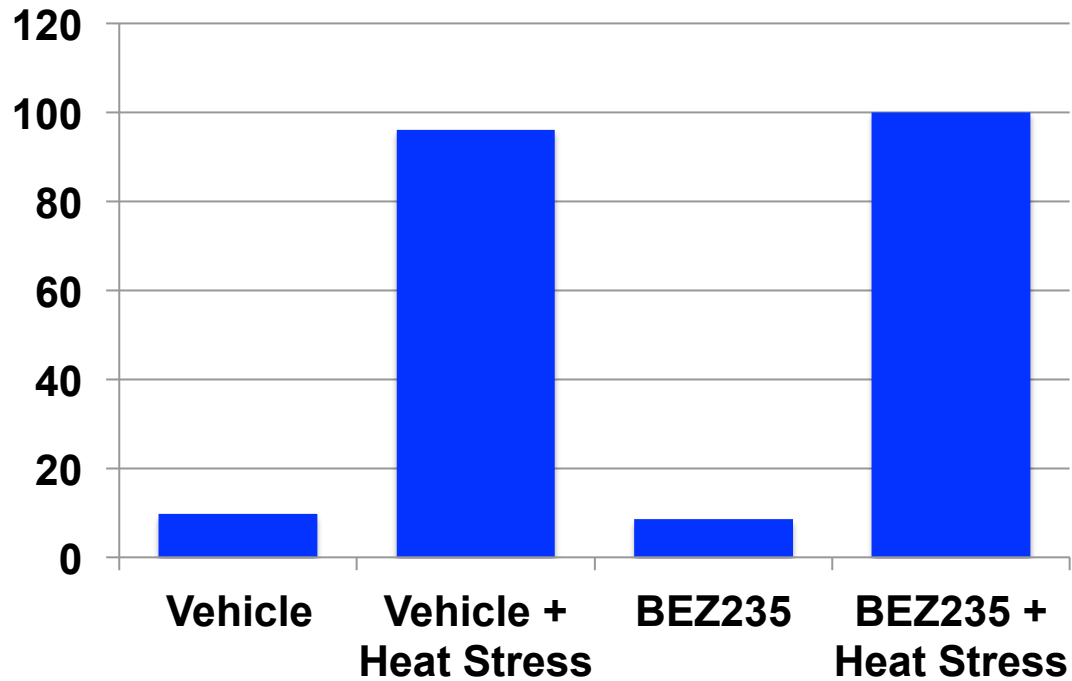



# ATF2 (Thr183/Tyr185)

LCMS Data

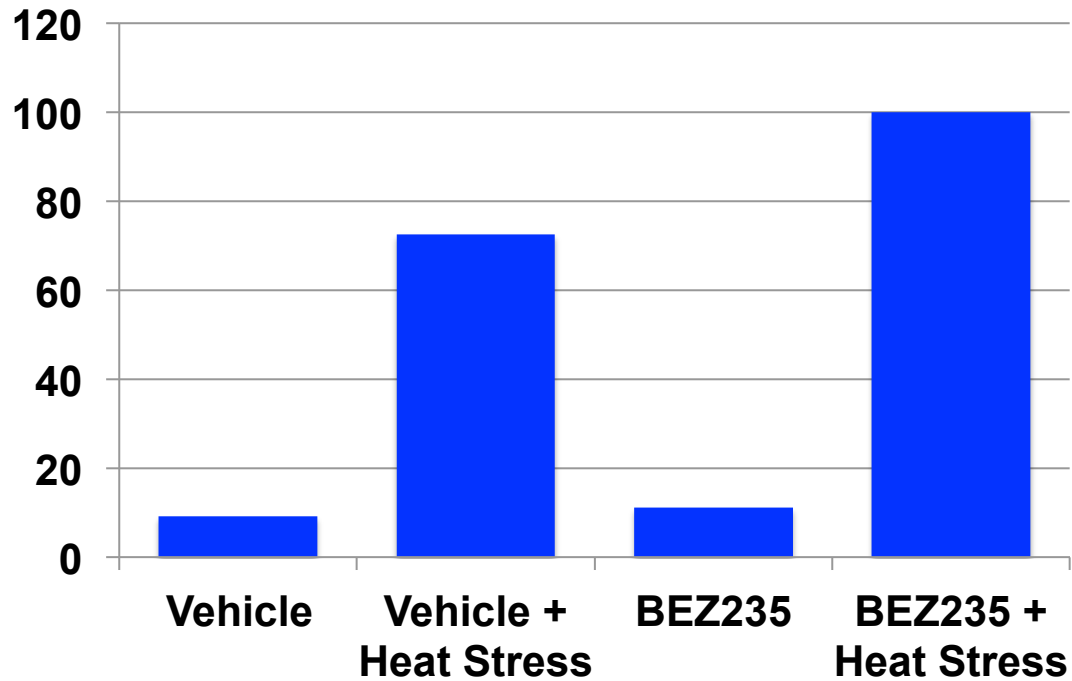

# EphA2 (Ser897)

LCMS Data

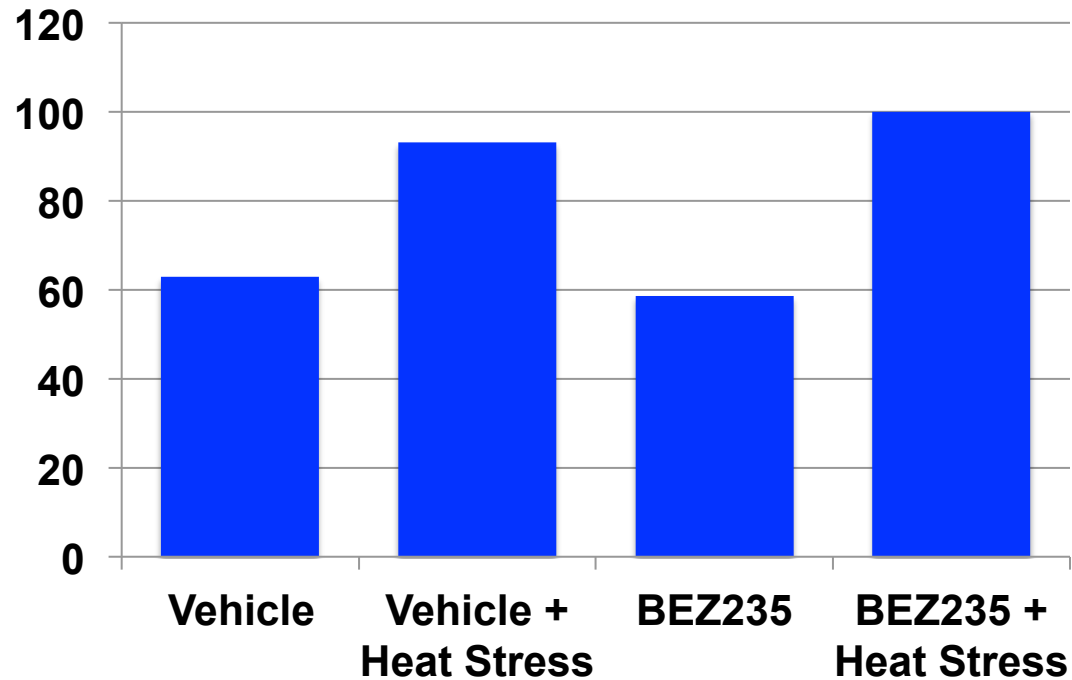

Supplement: Supplementary file 1 [file 1]
